# Supplementary material
Source: Springer Nature journal article supplement (https://www.springermedizin.de/resource/supplementary/13014_2012_596_MOESM2_ESM.pdf/9634176)
Supplement: MOESM2 [file 9634176]

### Ipsilateral lung TT

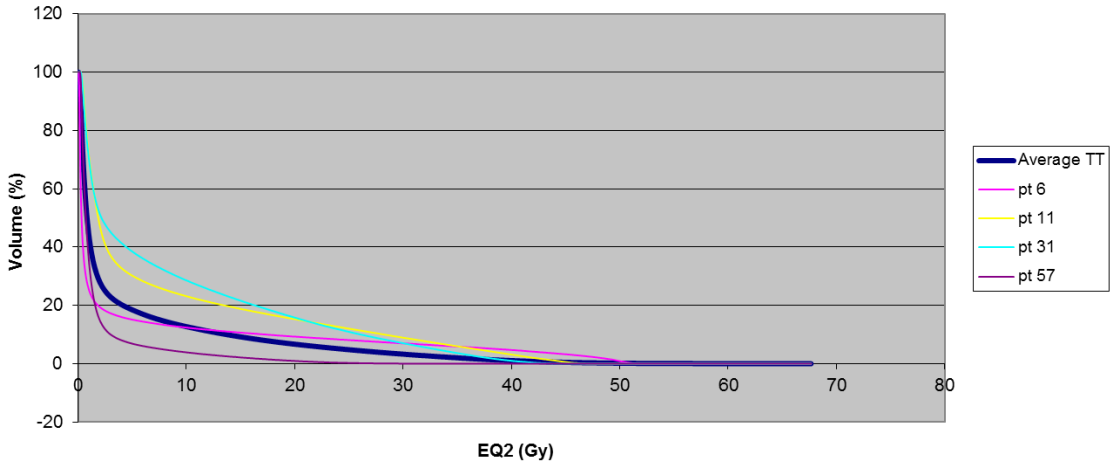

### Ipsilateral lung CR

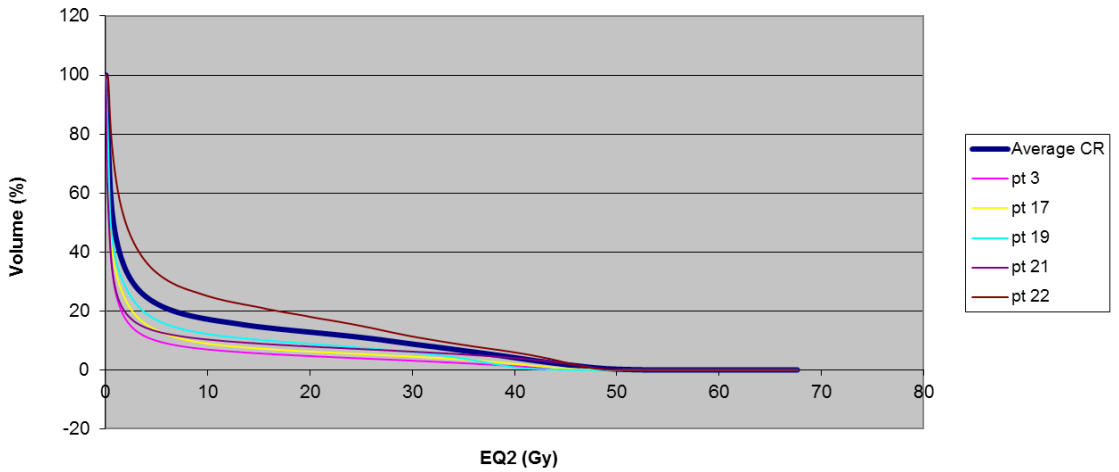

| Patient nr | Boost dose | Lymph node irradiation | Adjuvant chemotherapy | Smoking (pack year) | Asthma |
|------------|------------|------------------------|-----------------------|---------------------|--------|
| 6          | -          | -                      | +                     | -                   | -      |
| 11         | -          | +                      | +                     | +                   | -      |
| 31         | -          | +                      | +                     | -                   | -      |
| 57         | +          | -                      | +                     | stopped (30)        | -      |
| 3          | -          | -                      | +                     | -                   | -      |
| 17         | +          | -                      | -                     | -                   | -      |
| 19         | +          | -                      | -                     | -                   | +      |
| 21         | -          | -                      | +                     | stopped (5)         | -      |
| 22         | +          | +                      | +                     | -                   | -      |
